# Supplementary material for: Gastruloid-derived primordial germ cell-like cells develop dynamically within integrated tissues
Source: PubMed Central journal article supplement (PMC10508693; doi:10.1242/dev.201790), 2023-09-11
Supplement: develop-150-201790-s1.pdf [file develop-150-201790-s1.pdf]

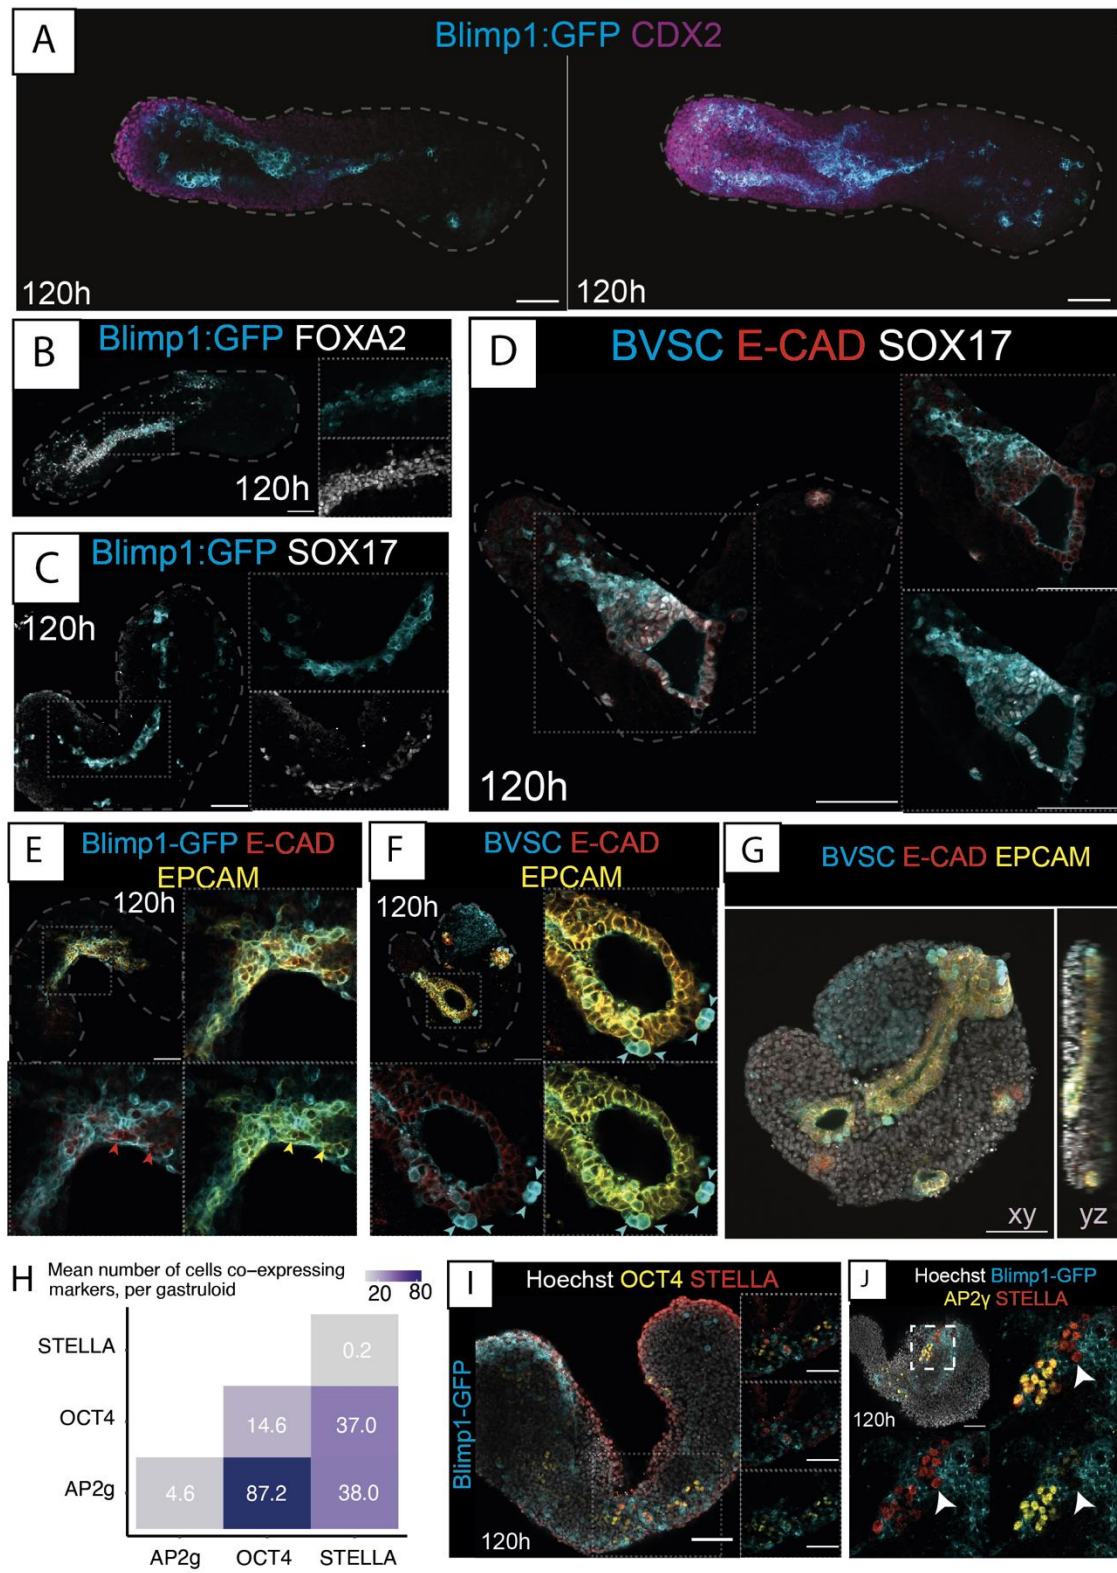

Supplementary Figure 1

**Fig. S1. Characterisation of Gld-PGCLCs and endodermal tracts. (A)** Z-slice (left) and maximum projection (right) of Blimp1-GFP gastruloid at 120h. **(B-D)** Expression of endodermal markers, FOXA2 **(B)** and SOX17 in Blimp1-GFP **(C)** and BVSC **(D)** gastruloids. **(E-G)** Expression of EpCAM in Blimp1-GFP **(E)** and BVSC **(F)** gastruloids. Cyan arrowheads, STELLA+ cells. **(G)** Z slice showing internal localisation of the EPCAM+, E-CADHERIN (E-Cad)+ tubular structure (left) and z-projection (right). **(H)** Quantification of number of cells co-expressing each pair of proteins, as indicated by colour scale. **(I)** Heterogeneous co-staining of STELLA with OCT4 and AP2 $\gamma$  in Blimp1-GFP gastruloids. White arrowhead, example of a STELLA+ AP2 $\gamma$ - cell. Insets, higher magnification images; Dashed line, morphological gastruloid outline from Hoechst staining; Dotted line, magnification region. Scale bars, 100  $\mu$ m.

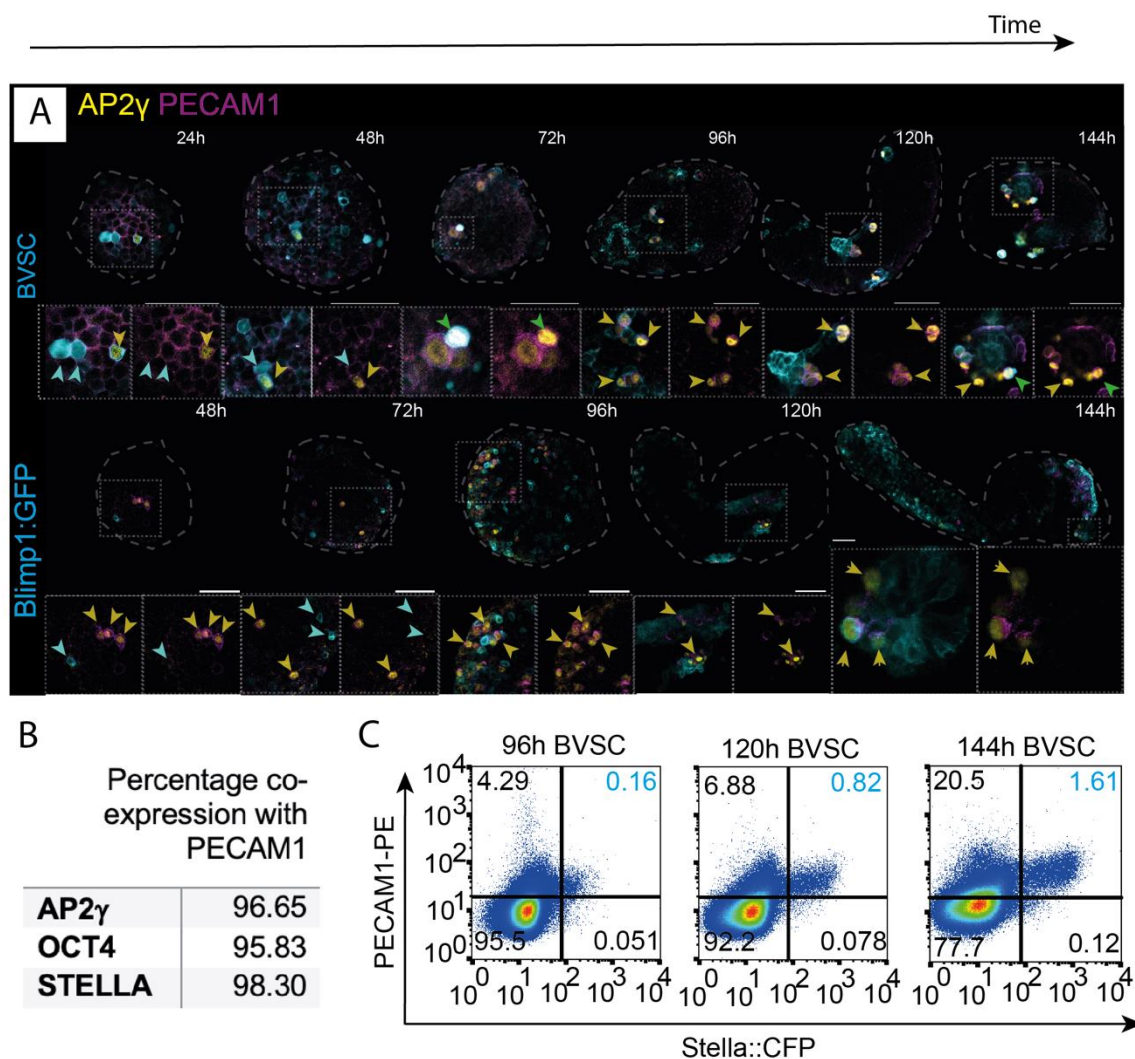

Supplementary Figure 2

**Fig. S2. Time course analysis of Gld-PGCLCs as indicated by PECAM1 staining. (A)** Time course of BVSC and Blimp1-GFP gastruloids from 24-144h, showing co-expression of PGCLC markers. Cyan arrowheads, STELLA<sup>+</sup> cells; Yellow arrowheads, AP2 $\gamma$ <sup>+</sup> cells; Green arrowheads, STELLA<sup>+</sup> AP2 $\gamma$ <sup>+</sup> cells. Insets, higher magnification images; Dashed line, morphological gastruloid outline from Hoechst staining; Dotted line, magnification region. Scale bars, 100  $\mu$ m. **(B)** Quantification of BVSC cells expressing protein indicated that also express PECAM1, as percentages, at 120h. **(C)** Flow cytometry analysis of Stella:eCFP from BVSC line and PECAM1, where dot-plot colour-bar shows data density. Numbers in graph show percentage occupancy of each quadrant.

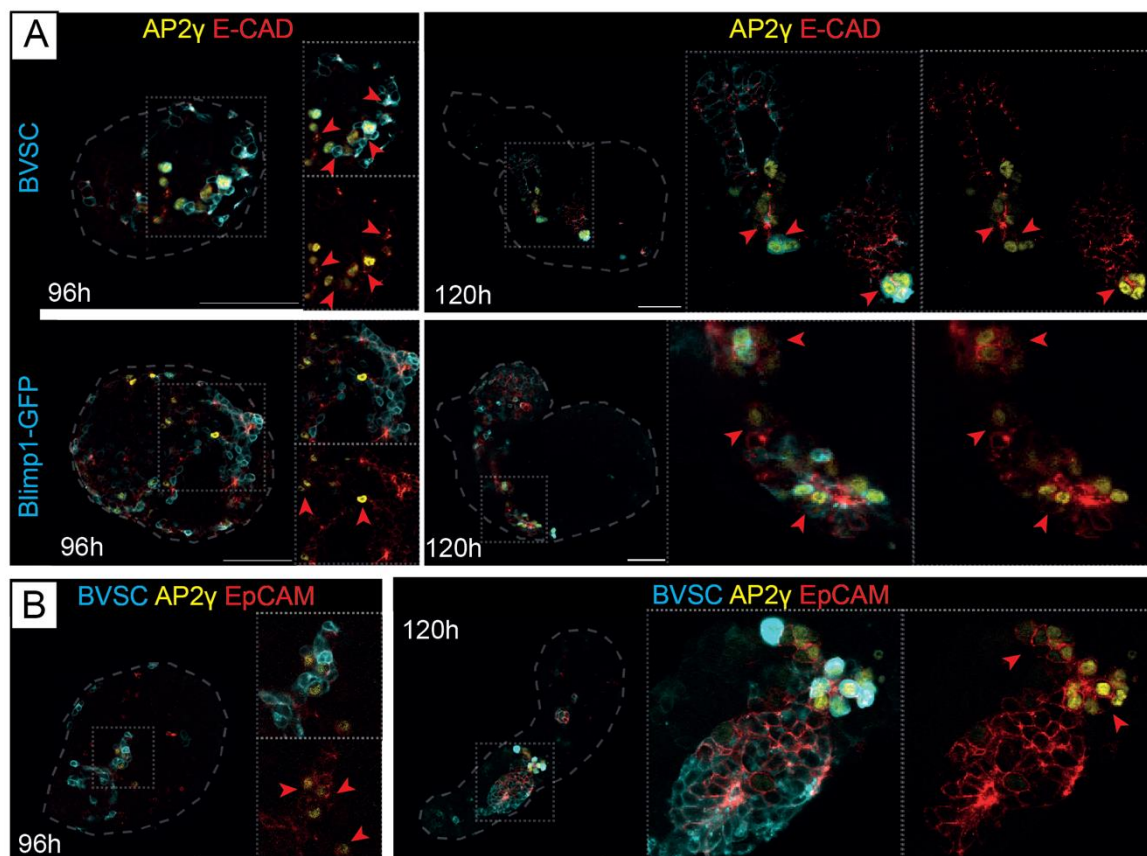

Supplementary Figure 3

**Fig. S3. Expression of cell membrane markers on Gld-PGCLCs and endodermal tract cells.** (A) Expression of E-Cadherin (E-Cad) in BVSC and Blimp1-GFP gastruloids. Red arrowheads, E-CAD on Gld-PGCLCs and neighbouring cells. (B) Expression of EpCAM in BVSC gastruloids. Red arrowheads, expression of EpCAM on Gld-PGCLCs and neighbouring cells. Insets, higher magnification images; Dashed line, morphological gastruloid outline from Hoechst staining; Dotted line, magnification region. Scale bars, 100  $\mu$ m.

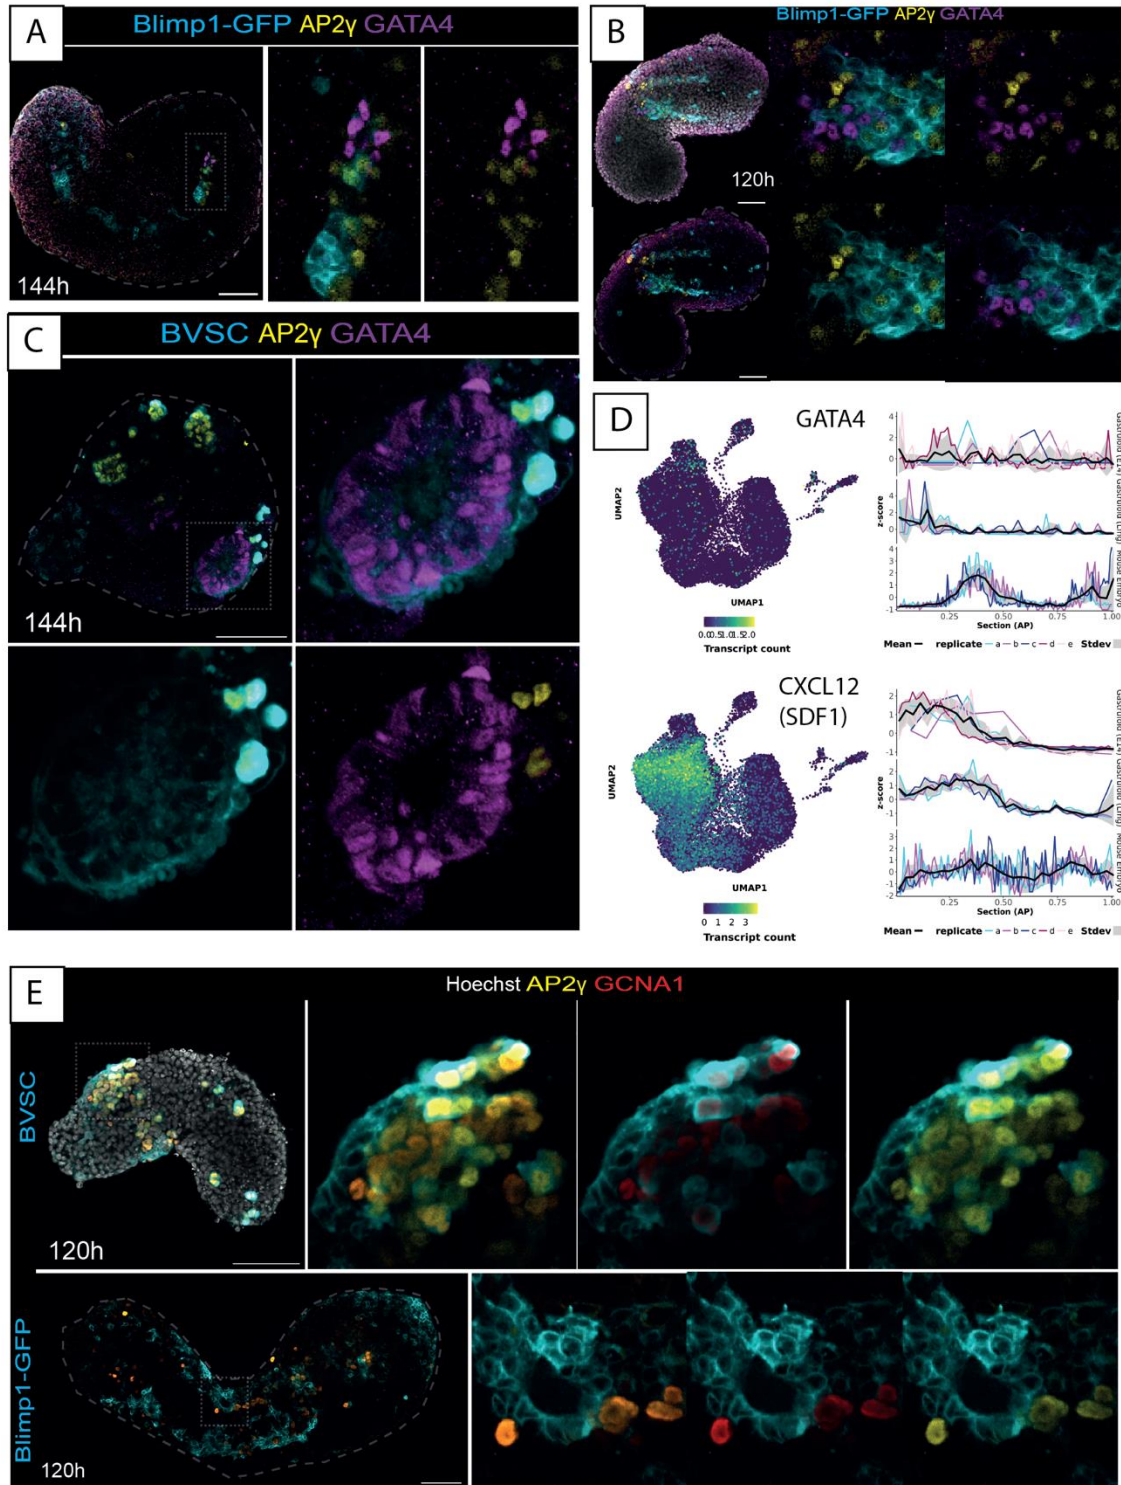

Supplementary Figure 4

**Fig. S4. Anterior Gld-PGCLC cluster associated gene expression. (A-C)** Expression of GATA4 in anterior regions adjacent to Gld-PGCLCs, in Blimp1-GFP (**A, B**) and BVSC (**C**) gastruloids. (**D**) A published gastruloid dataset shows expression of *Gata4* and *Cxcl12* genes (left),

particularly localised to anterior end as evidenced by tomo-sequencing (right). Individual lines represent different sample replicates, black line represents the average profile, and grey ribbon represents the standard deviation (Stdev). See <sup>1</sup> for further details. **(E)** Expression of GCNA1 particularly in AP2 $\gamma$ + Gld-PGCLCs. Insets, higher magnification images; Dashed line, morphological gastruloid outline from Hoechst staining; Dotted line, magnification region. Scale bars, 100  $\mu$ m.

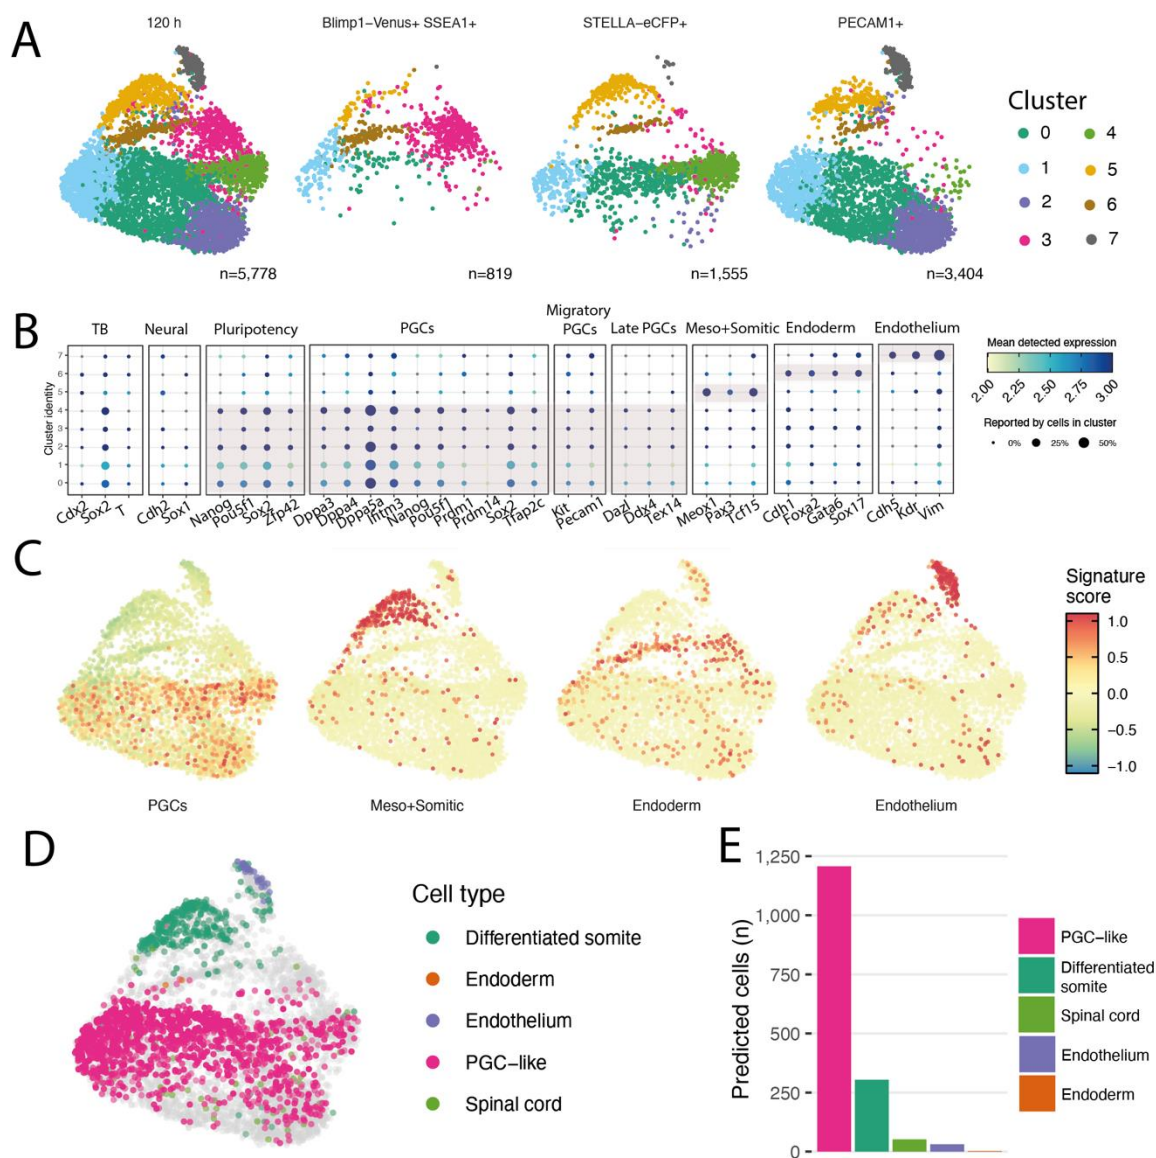

Supplementary Figure 5

**Fig. S5. Analysis of single-cell transcriptomics. (A)** UMAP of Gld-PGCLCs from all 3 sorted populations, showing 8 distinct clusters according to set parameters (see Methods). **(B)** Gene expression within clusters, grouped by biological categories. Shading indicates the potential identity of clusters: cluster 0-4 as PGC-like, cluster 5 as Meso+Somitic-like, cluster 6 as Endoderm-like and cluster 7 as endothelium-like. **(C)** Module Score information for selected gene signatures across the UMAP representation. **(D)** Cell label transfer from published gastruloid dataset<sup>1</sup>, showing general concordance with gene expression annotation. **(E)** Quantification of cells assigned to identities by label transfer with the van den Brink dataset.

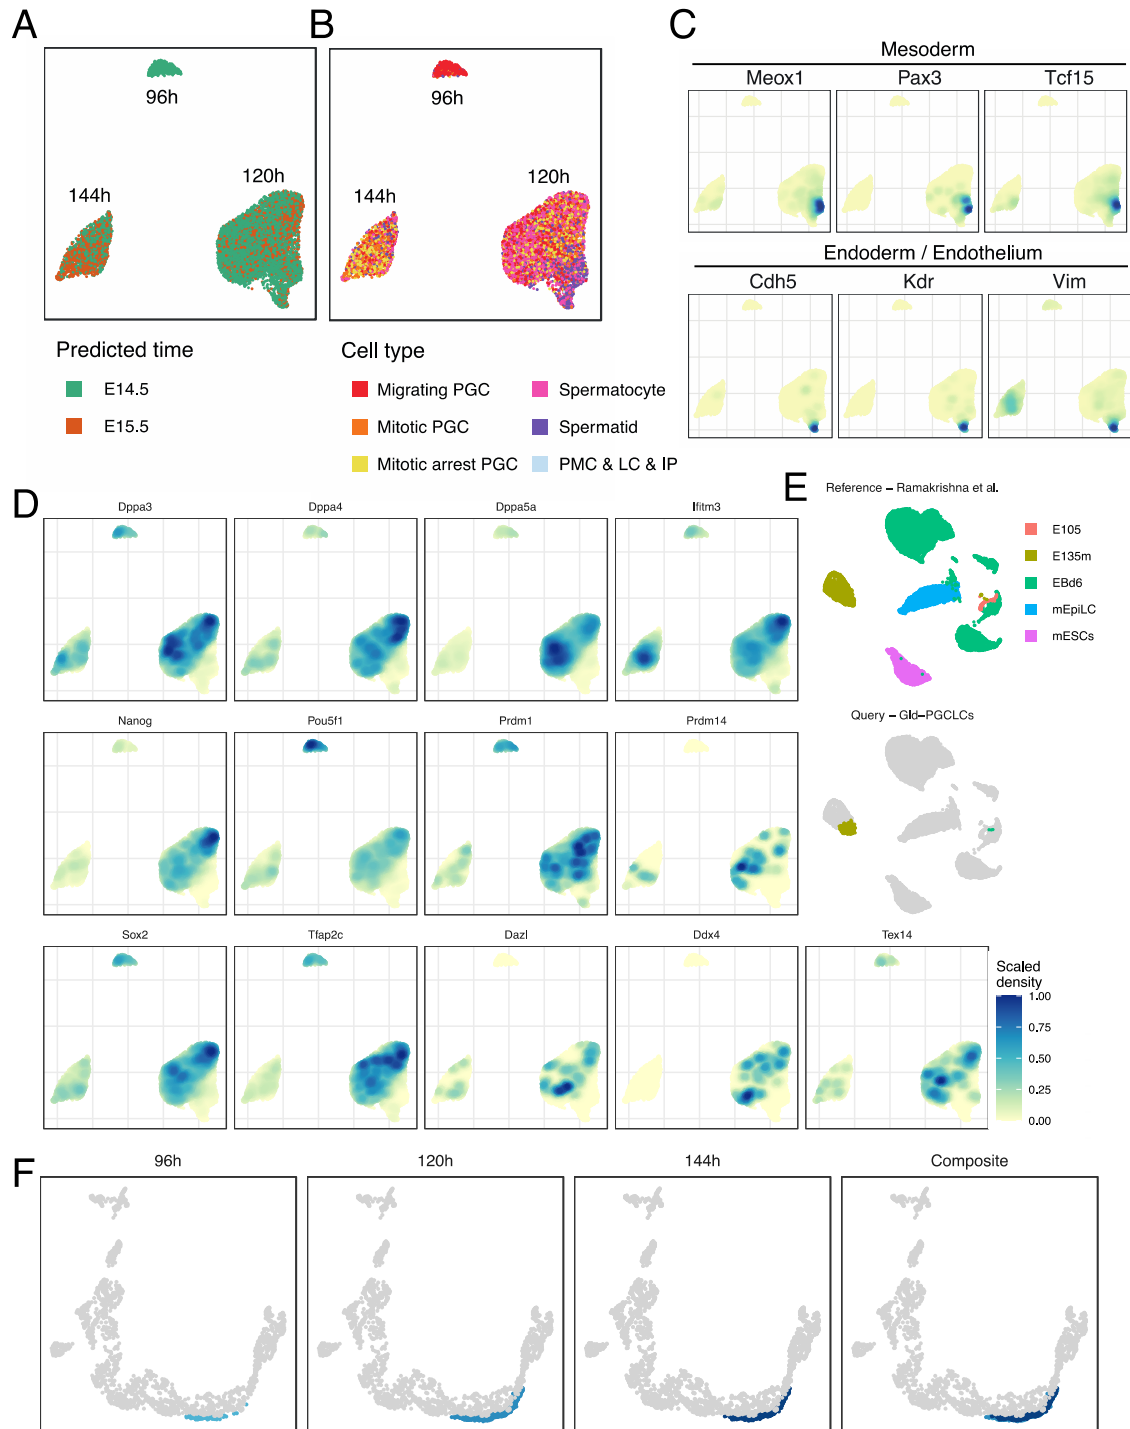

Supplementary Figure 6



**Fig. S6. Time course single-cell RNAseq of Gld-PGCLCs.** **(A)** Gld-PGCLCs sorted from gastruloids at 96, 120 and 144h post aggregation and coloured by embryonic timepoint labels transferred from *in vivo* Embryonic PGC data subset from Zhao and colleagues (see Methods for details). **(B)** Gld-PGCLCs from all sampled gastruloid timepoints, with *in vivo* Embryonic cell type labels transferred. **(C)** Mesodermal and endodermal marker gene expression of time course Gld-PGCLC dataset. Colourbar as in panel (D). **(D)** PGC marker gene expression of time course Gld-PGCLC dataset visualised using Nebulosa (see Methods). **(E)** Integrated Gld-PGCLCs across all timepoints projected onto Ramakrishna and colleagues' dataset, showing reference dataset (top) and projected Gld-PGCLCs (bottom). **(F)** Projection of Gld-PGCLCs across all timepoints onto *in vivo* Embryonic PGC dataset. Reference map as shown in Figure 5.

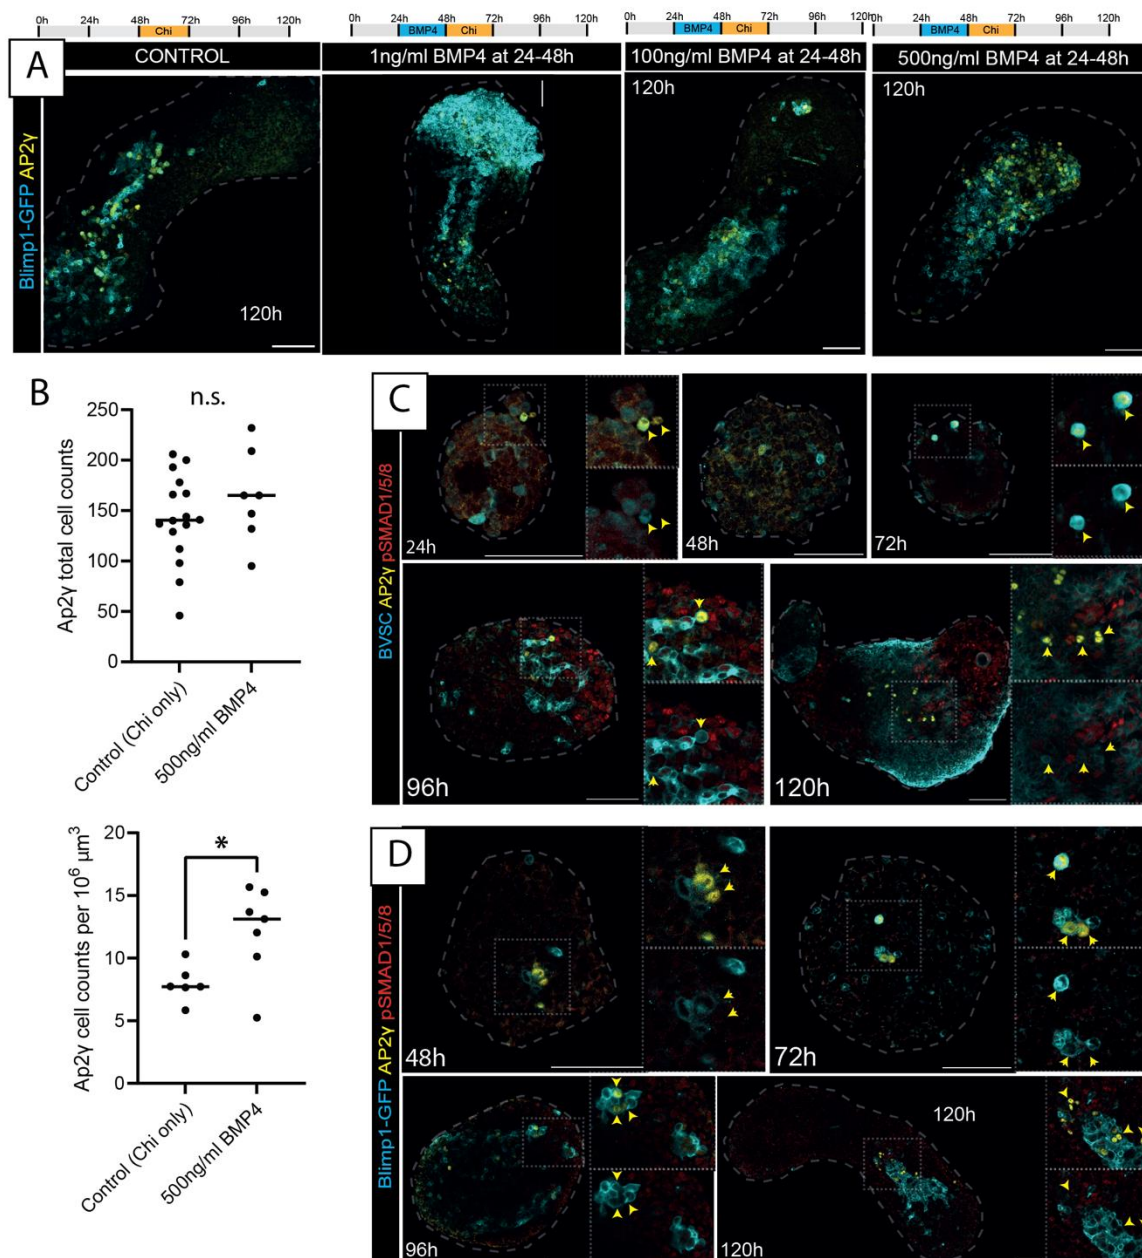

Supplementary Figure 7

**Fig. S7. BMP signalling and Gld-PGCLCs.** (A) Effect of BMP4 addition on Blimp1-GFP gastruloids at time indicated. (B) Quantification of AP2y+ cell counts in Blimp1-GFP gastruloids at 120h. (C-D) Localisation of phospho-SMAD1/5/8 in BVSC (C) and Blimp1-GFP (D) gastruloids. Yellow arrowheads, Gld-PGCLCs. Insets, higher magnification images; Dashed line, morphological gastruloid outline from Hoechst staining; Dotted line, magnification region. Scale bars, 100 μm.

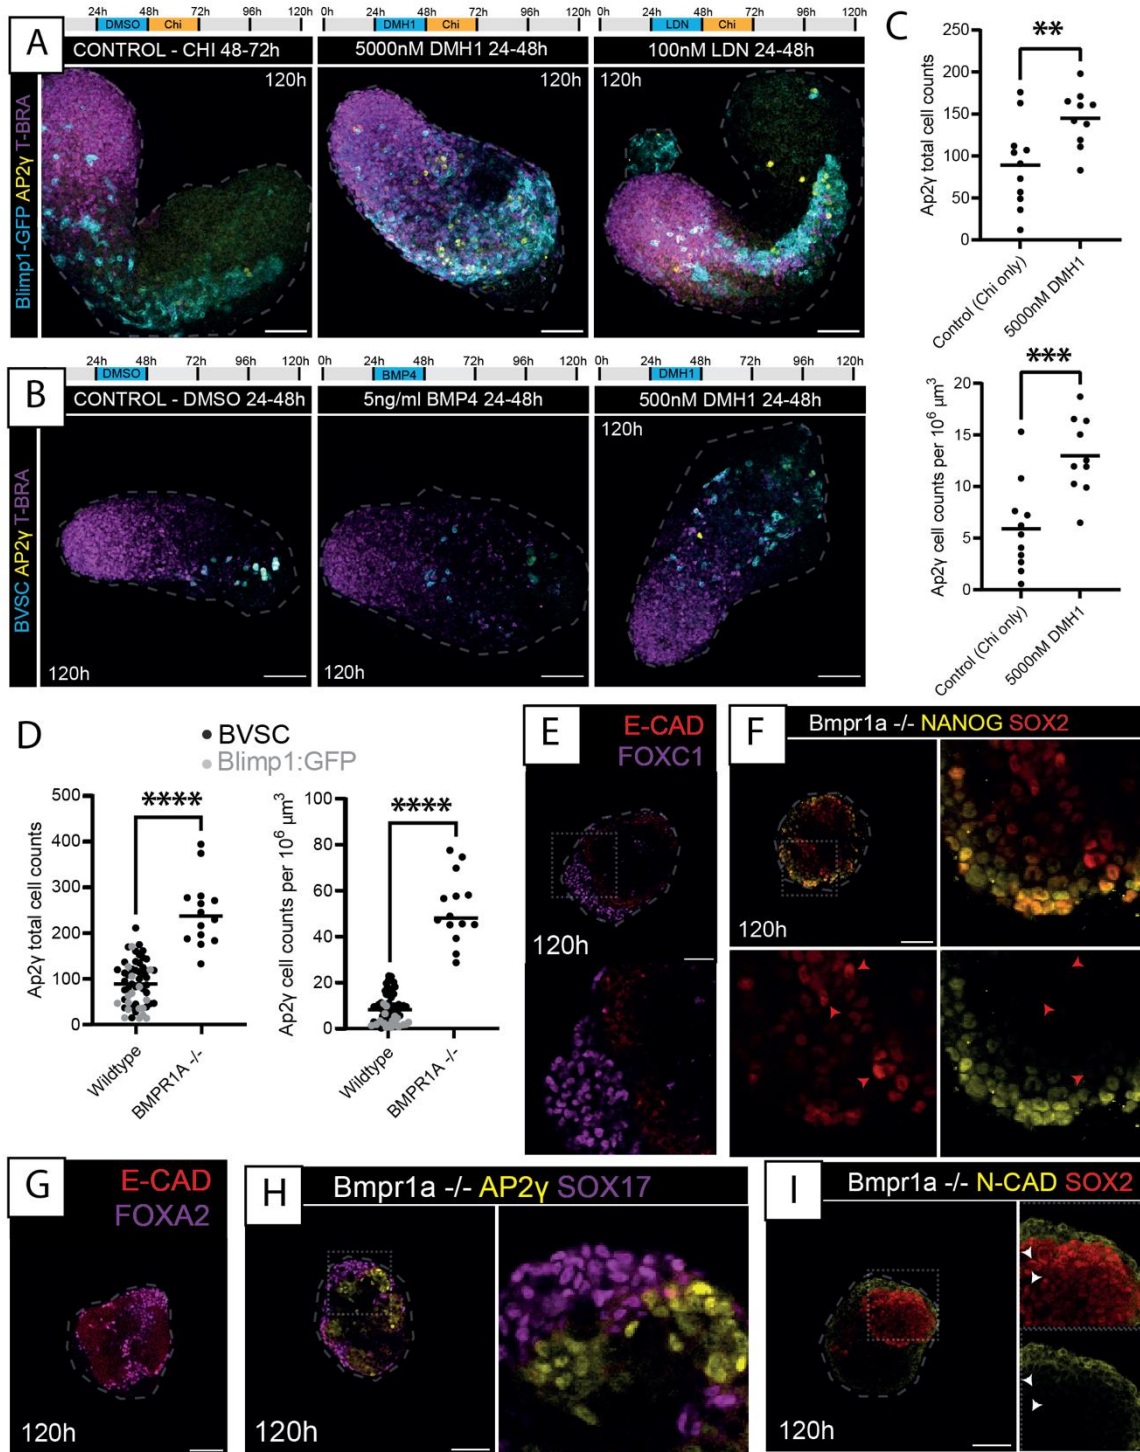

Supplementary Figure 8

**Fig. S8. Effect of reduced BMP signalling on Gld-PGCLCs. (A)** Inhibition of BMP signalling by DMH1 or LDN1 at times indicated. **(B)** Effect of BMP signalling modulation in the absence of Wnt signalling through Chi exposure. **(C)** Quantification of AP2γ+ cell counts in Blimp1-GFP gastruloids at 120h following DMH1 exposure. **(D)** Quantification of AP2γ+ cell counts in

BVSC and Blimp1-GFP gastruloids (Wildtype) or BMPR1A<sup>-/-</sup> at 120h. **(E-I)** BMPR1A<sup>-/-</sup> gastruloids show presence of markers of mesoderm, FOXC1, **(E)**, neural, SOX2, **(F)**, endoderm, FOXA2 and SOX17, **(G, H)** and ectoderm, N-Cadherin **(I)**. Red arrowheads, SOX2<sup>+</sup> NANOG<sup>-</sup> ectodermal cell examples. White arrowheads, SOX2<sup>+</sup> N-CAD<sup>-</sup> Gld-PGCLC examples. Insets, higher magnification images; Dashed line, morphological gastruloid outline from Hoechst staining; Dotted line, magnification region. Scale bars, 100  $\mu$ m.

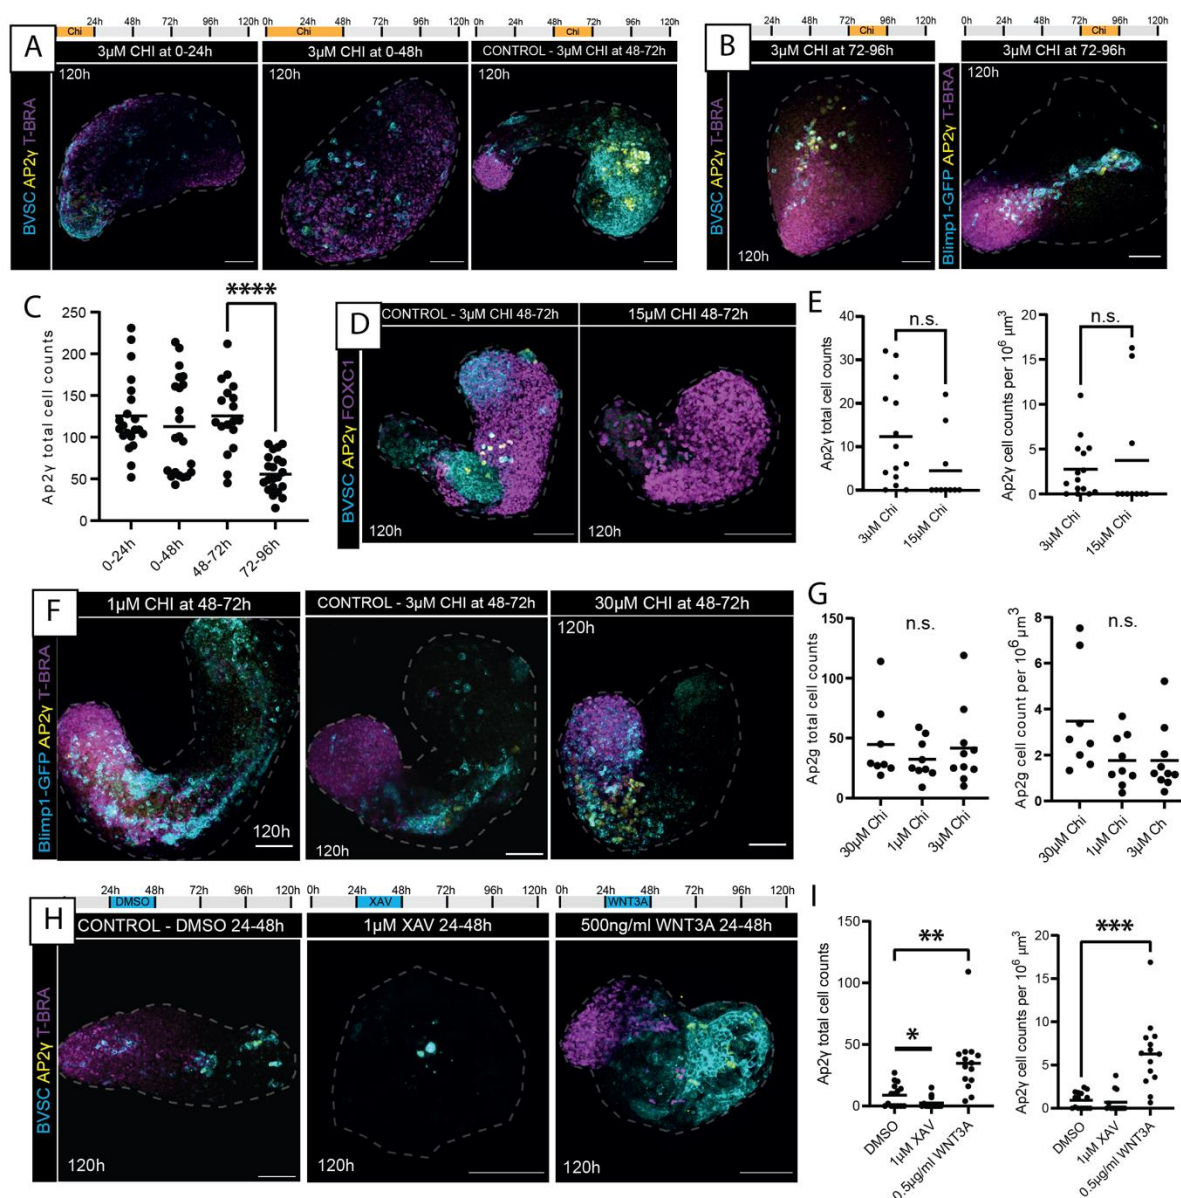

Supplementary Figure 9

**Fig. S9. Wnt signalling and Gld-PGCLCs.** (A-B) Maximum projection of gastruloids following shifts in Chi exposure, at timepoint and concentrations indicated. (C) Quantification of AP2 $\gamma$ + cell counts in BVSC gastruloids at 120h following Chi exposure at timepoints indicated. (D) Maximum projection of BVSC gastruloids following increase in Chi concentration at timepoints indicated. (E) Quantification of AP2 $\gamma$ + cell counts in BVSC gastruloids at 120h following Chi concentration modulation at 48-72h. (F) Maximum projection of Blimp1-GFP gastruloids following increase in Chi concentration at timepoints indicated. (G) Quantification of AP2 $\gamma$ + cell counts in Blimp1-GFP gastruloids at 120h

following Chi concentration modulation at 48-72h. **(H)** Maximum projection of BVSC gastruloids following Wnt signalling modulation by ligand application, Wnt3a, or inhibitor exposure, XAV, in the absence of Chi pulse. **(I)** Quantification of AP2 $\gamma$ + cell counts in BVSC gastruloids at 120h following Wnt signalling modulation, at timepoint and concentrations indicated. Dashed line, morphological gastruloid outline from Hoechst staining; Dotted line, magnification region. Scale bars, 100  $\mu$ m.

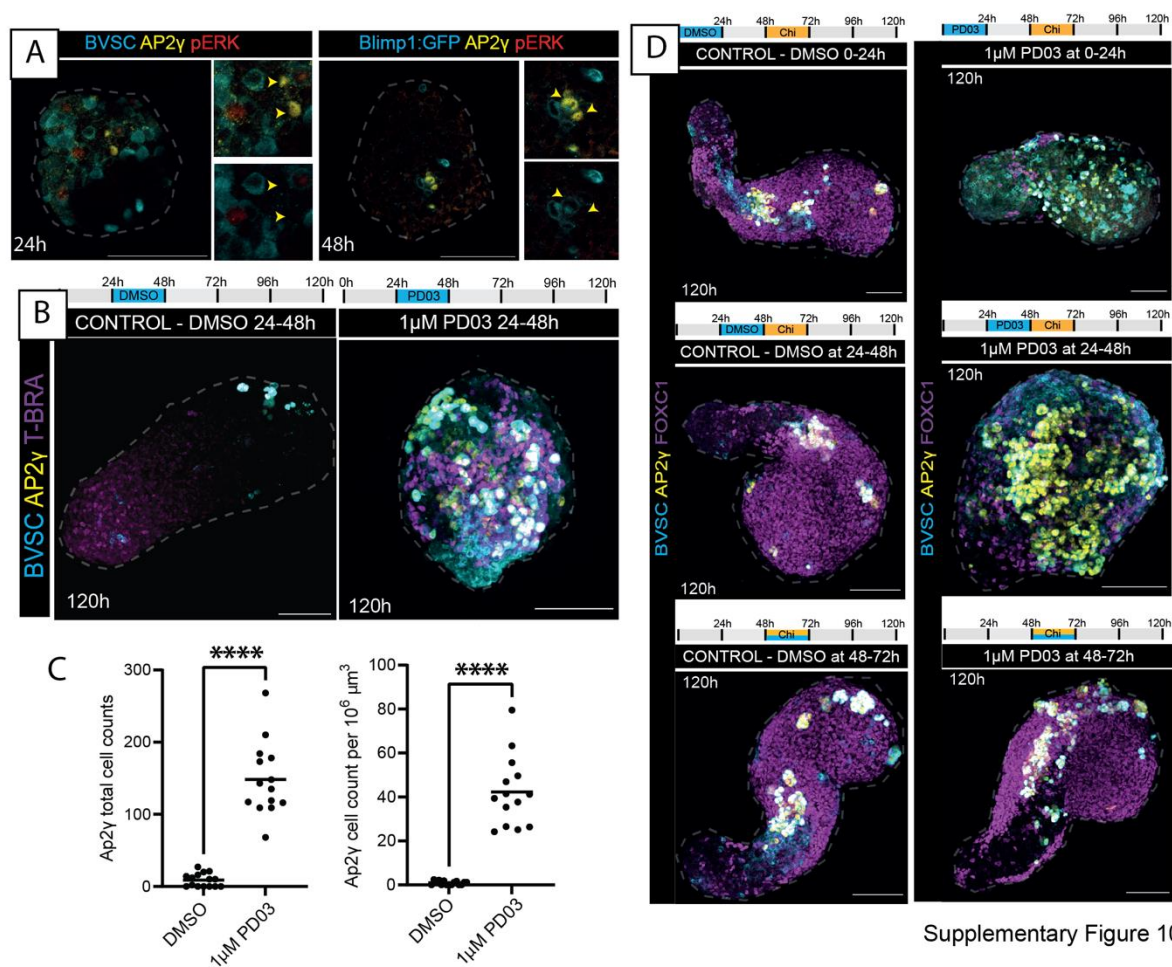

Supplementary Figure 10

**Fig. S10. FGF signalling and Gld-PGCLCs. (A)** Z slice of phospho-ERK in BVSC (left) and Blimp1-GFP (right) gastruloids at onset of Gld-PGCLC specification. Yellow arrowheads, AP2γ+ pERK- cells. **(B)** Maximum projection of BVSC gastruloids with inhibition of FGF signalling by exposure to PD03 at time and concentration indicated, in the absence of Chi pulse. **(C)** Quantification of AP2γ+ cell counts in BVSC gastruloids at 120h following PD03 exposure at 24-48h, in the absence of Chi pulse. **(D)** Maximum projection of BVSC gastruloids following FGF signalling modulation by PD03 at timepoints indicated. Insets, higher magnification images; Dashed line, morphological gastruloid outline from Hoechst staining; Dotted line, magnification region. Scale bars, 100 µm.

**Table S1. Table of gastruloid lengths and volumes, from BVSC and Blimp1-GFP gastruloids at 120h and 144h.**

120h

| Gastruloid measurements                     | Gastruloid type                         |                                         |
|---------------------------------------------|-----------------------------------------|-----------------------------------------|
|                                             | BVSC                                    | Blimp1-GFP                              |
| Mean Length ( $\mu\text{m}$ ) ( $\pm$ SD)   | 607.00 $\pm$ 122.20                     | 933.07 $\pm$ 106.00                     |
| Mean volume ( $\mu\text{m}^3$ ) ( $\pm$ SD) | 0.66 $\times 10^7 \pm 2.62 \times 10^6$ | 2.17 $\times 10^7 \pm 5.90 \times 10^6$ |
| Number of samples                           | 32                                      | 16                                      |

144h

| Gastruloid measurements                     | Gastruloid type                         |                                         |
|---------------------------------------------|-----------------------------------------|-----------------------------------------|
|                                             | BVSC                                    | Blimp1-GFP                              |
| Mean Length ( $\mu\text{m}$ ) ( $\pm$ SD)   | 301.9 $\pm$ 45.53                       | 1014 $\pm$ 205.5                        |
| Mean volume ( $\mu\text{m}^3$ ) ( $\pm$ SD) | 0.33 $\times 10^7 \pm 0.24 \times 10^6$ | 1.86 $\times 10^7 \pm 5.82 \times 10^6$ |
| Number of samples                           | 24                                      | 18                                      |



**Table S2. Table of number of cells per Gld-PGCLC cluster in 144h gastruloids.**

Gast, Gastruloid replicate.

| Cluster no.                             | <u>Gast 1</u> |   |   |   |   | <u>Gast 2</u> |   |   |   |   | <u>Ga</u><br><u>st 3</u> | <u>Gast 4</u> |   |   | <u>Gast 5</u> |   |   | <u>Ga</u><br><u>st 6</u> | <u>Gast 7</u> |   |   |   |   |
|-----------------------------------------|---------------|---|---|---|---|---------------|---|---|---|---|--------------------------|---------------|---|---|---------------|---|---|--------------------------|---------------|---|---|---|---|
|                                         | 1             | 2 | 3 | 4 | 5 | 6             | 7 | 8 | 9 | 0 | 11                       | 2             | 3 | 4 | 5             | 6 | 7 | 18                       | 9             | 0 | 1 | 2 | 3 |
| AP2γ + PGC<br>marker                    | 0             | 2 | 1 | 4 | 3 | 6             | 4 | 7 | 6 | 0 | 0                        | 4             | 3 | 8 | 4             | 2 | 5 | 7                        | 5             | 6 | 5 | 6 | 8 |
| AP2γ + Blimp1<br>PGC marker +<br>Blimp1 | 5             | 6 | 6 | 1 | 3 | 0             | 0 | 5 | 0 | 0 | 12                       | 0             | 0 | 0 | 0             | 0 | 0 | 0                        | 0             | 0 | 0 | 0 | 0 |
| AP2γ + PGC<br>marker +<br>Blimp1        | 0             | 0 | 0 | 0 | 0 | 0             | 0 | 0 | 0 | 0 | 0                        |               | 1 |   | 1             |   |   |                          |               |   |   |   |   |
|                                         | 0             | 6 | 3 | 0 | 0 | 3             | 0 | 0 | 8 | 0 | 1                        | 4             | 3 | 5 | 6             | 1 | 0 | 2                        | 2             | 0 | 3 | 0 | 4 |
| Total                                   | 5             | 4 | 0 | 5 | 6 | 9             | 4 | 2 | 4 | 0 | 13                       | 8             | 6 | 3 | 0             | 3 | 5 | 9                        | 7             | 6 | 0 | 6 | 2 |
| Total cells in<br>cluster               | 1             | 1 |   | 1 |   | 1             | 1 | 1 |   |   |                          | 1             | 1 | 1 | 1             |   |   |                          | 1             | 1 |   | 1 |   |
|                                         | 9             | 4 | 1 | 7 | 0 | 9             | 6 | 5 | 4 | 0 | 13                       | 8             | 6 | 3 | 0             | 3 | 5 | 9                        | 3             | 6 | 0 | 7 | 2 |

**Table S3. Table of number and percentage of cells co-expressing AP2 $\gamma$  with additional PGC markers, including DAZL, 5hmC and H3K27me3.**

|                         | Mean total Ap2 $\gamma$<br>cell count ( $\pm$ SD) | Mean total<br>DAZL cell<br>count ( $\pm$ SD)        | Mean total<br>co-<br>expressed<br>cell count ( $\pm$<br>SD) | Mean %<br>co-<br>expressed<br>in Ap2 $\gamma$<br>cells | Mean %<br>co-<br>expressed<br>in DAZL<br>cells        |
|-------------------------|---------------------------------------------------|-----------------------------------------------------|-------------------------------------------------------------|--------------------------------------------------------|-------------------------------------------------------|
| BVSC 144h (n = 8)       | 225.9 $\pm$ 112.2                                 | 26.1 $\pm$ 10.2                                     | 23.3 $\pm$ 10.3                                             | 10%                                                    | 89%                                                   |
| Blimp1-GFP 144h (n = 7) | 102.1 $\pm$ 63.2                                  | 71.9 $\pm$ 48.2                                     | 49.6 $\pm$ 38.1                                             | 49%                                                    | 69%                                                   |
| Combined 144h (n = 15)  | 168.13 $\pm$ 110.0                                | 47.5 $\pm$ 40.1                                     | 35.5 $\pm$ 29.3                                             | 21%                                                    | 75%                                                   |
|                         | Mean total Ap2 $\gamma$<br>cell count ( $\pm$ SD) | Mean total<br>5hmC cell<br>count ( $\pm$ SD)        | Mean total<br>co-<br>expressed<br>cell count ( $\pm$<br>SD) | Mean %<br>co-<br>expressed<br>in Ap2 $\gamma$<br>cells | Mean %<br>co-<br>expressed<br>in 5hmC<br>cells        |
| BVSC 144h (n = 6)       | 133.0 $\pm$ 47.1                                  | 80.5 $\pm$ 30.5                                     | 64.2 $\pm$ 30.5                                             | 48%                                                    | 80%                                                   |
| Blimp1-GFP 144h (n = 3) | 41.3 $\pm$ 23.8                                   | 23.7 $\pm$ 19.7                                     | 11.0 $\pm$ 3.5                                              | 27%                                                    | 46%                                                   |
| Combined 144h (n = 9)   | 102.4 $\pm$ 60.2                                  | 61.6 $\pm$ 38.6                                     | 46.4 $\pm$ 35.9                                             | 45%                                                    | 75%                                                   |
|                         | Mean total Ap2 $\gamma$<br>cell count ( $\pm$ SD) | Mean total<br>H3K27me3<br>cell count ( $\pm$<br>SD) | Mean total<br>co-<br>expressed<br>cell count ( $\pm$<br>SD) | Mean %<br>co-<br>expressed<br>in Ap2 $\gamma$<br>cells | Mean %<br>co-<br>expressed<br>in<br>H3K27me3<br>cells |
| BVSC 144h (n = 8)       | 146.1 $\pm$ 61.9                                  | 80.1 $\pm$ 16.6                                     | 50.1 $\pm$ 19.1                                             | 34%                                                    | 63%                                                   |
| Blimp1-GFP 144h (n = 2) | 63.5 $\pm$ 2.1                                    | 157.5 $\pm$ 26.2                                    | 24.0 $\pm$ 8.5                                              | 38%                                                    | 15%                                                   |
| Combined 144h (n = 10)  | 129.6 $\pm$ 64.8                                  | 95.6 $\pm$ 36.8                                     | 44.9 $\pm$ 20.3                                             | 35%                                                    | 47%                                                   |

**Table S4. Guide RNA sequences for CRISPR/Cas9 targeting and validation.**

| Name                    | Sequence (5'-3')          |
|-------------------------|---------------------------|
| gRNA1                   | aaacTCAAATGTCGGGGTAGTTGC  |
| gRNA2                   | aaacGATGCGGGATACGCCAGTGAc |
| hU6-F                   | GAGGGCCTATTTCCCATGATT     |
| P1 (Fwd; wt Sox17)      | GCTTTACGAGTTCCTCTGGGC     |
| P2 (Rev; 3' UTR Exon 5) | GGCAAATTTTGTGGGAAGTGGG    |
| P3 (Rev; eGFP)          | CGTTGGGGTCTTTGCTCAGG      |
| P4 (Rev; wt Sox17)      | CCATGTGCGGAGACATCAGC      |

**Table S5. Signalling modulators**

| Name                                 | Supplier                      |
|--------------------------------------|-------------------------------|
| Bone morphogenetic protein 4 (BMP4)  | R&D Systems, 314-BP           |
| CHIR99021 (Chiron or CHI)            | Cambridge Stem Cell Institute |
| Dorsomorphin Homologue 1 (DMH1)      | MedChem Express, HY-12273     |
| LDN 193189 dihydrochloride (LDN)     | Tocris Biosciences, 6053      |
| PD0325901 (PD03)                     | Cambridge Stem Cell Institute |
| Wnt3a (Wnt family Member 3a) protein | Abcam, ab81484                |
| XAV939 (XAV)                         | Selleck Chemicals, S1180      |

**Table S6. Primary antibodies**

| Antibody target  | Host species | Supplier                   | Catalogue number | Dilution  |
|------------------|--------------|----------------------------|------------------|-----------|
| 5hmC             | Rabbit       | Abcam                      | ab214728         | 1 in 100  |
| AP2-gamma        | Mouse        | Santa Cruz                 | sc-53162         | 1 in 100  |
| Brachyury        | Rabbit       | Abcam                      | ab209665         | 1 in 100  |
| DAZL             | Rabbit       | Abcam                      | ab215718         | 1 in 200  |
| E-cadherin       | Mouse        | Abcam                      | ab76055          | 1 in 100  |
| E-cadherin       | Rat          | Takara                     | M108             | 1 in 100  |
| EpCAM            | Rabbit       | Abcam                      | ab221552         | 1 in 100  |
| FoxA2            | Rabbit       | Abcam                      | ab108422         | 1 in 100  |
| FoxC1            | Rabbit       | Abcam                      | ab223850         | 1 in 200  |
| GATA4            | Rabbit       | Abcam                      | ab84593          | 1 in 200  |
| GCNA1 (Tra98)    | Rat          | Abcam                      | ab82527          | 1 in 200  |
| GFP              | Chicken      | Abcam                      | ab13970          | 1 in 2000 |
| Histone H3K27me3 | Rabbit       | Abcam                      | ab192985         | 1 in 100  |
| Nanog            | Rat          | ThermoFisher Scientific    | 14-5761-80       | 1 in 250  |
| Nanog            | Rabbit       | Abcam                      | ab214549         | 1 in 100  |
| N-cadherin       | Mouse        | BD Biosciences             | 610921           | 1 in 200  |
| Oct4             | Rabbit       | Abcam                      | ab200834         | 1 in 200  |
| PECAM1 (CD31)    | Rat          | BD Biosciences             | 557355           | 1 in 200  |
| PhosphoERK       | Rabbit       | Cell Signalling Technology | 4370             | 1 in 100  |
| PhosphoSMAD1/5/8 | Rabbit       | Cell Signalling Technology | 13820            | 1 in 100  |
| Stella (DPPA3)   | Goat         | R&D Systems                | AF2566           | 1 in 50   |
| Sox2             | Rabbit       | Abcam                      | ab92494          | 1 in 200  |
| Sox17            | Rabbit       | Abcam                      | ab224637         | 1 in 100  |
| CDX2             | Rabbit       | Abcam                      | ab76541          | 1 in 200  |

**Table S7. Secondary antibodies and primary conjugate**

| Antibody target | Antibody species/type | Supplier       | Catalogue number | Dye                |
|-----------------|-----------------------|----------------|------------------|--------------------|
| Chicken IgY     | Goat                  | Abcam          | ab150173         | Alexa 488          |
| Mouse IgG       | Donkey                | ThermoFisher   | A10037           | Alexa 568          |
| Mouse IgG       | Goat                  | ThermoFisher   | A21236           | Alexa 647          |
| Rabbit IgG      | Donkey                | ThermoFisher   | A21206           | Alexa 488          |
| Rabbit IgG      | Donkey                | ThermoFisher   | A10042           | Alexa 568          |
| Rabbit IgG      | Donkey                | ThermoFisher   | A31573           | Alexa 647          |
| Rat IgG         | Donkey                | ThermoFisher   | A21208           | Alexa 488          |
| Rat IgG         | Donkey                | Abcam          | ab150153         | Alexa 647          |
| PECAM1(CD31)    | Rat                   | BD Biosciences | 553373           | Phycoerythrin (PE) |

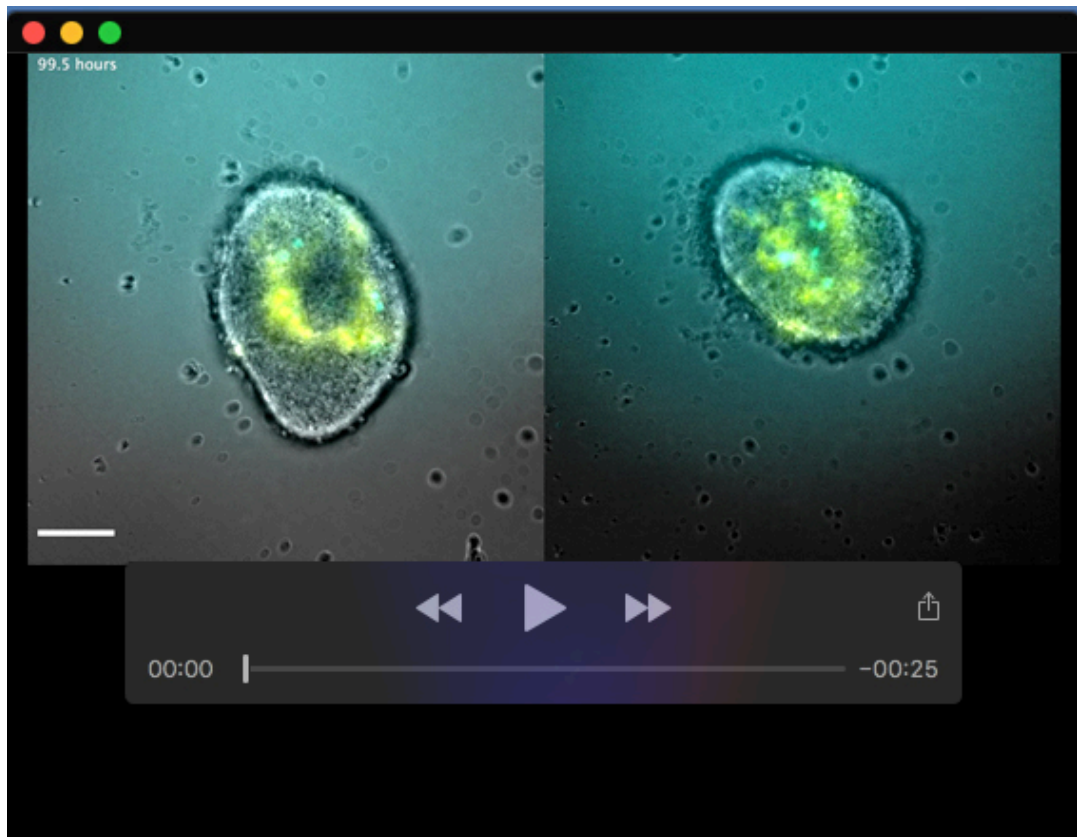

**Movie 1.** Widefield imaging of two BVSC gastruloids from 98h after aggregation, imaged at 20 minute intervals. Cyan, Blimp1-GFP; Yellow, Stella:eCFP. Scale bar = 100  $\mu$ m.

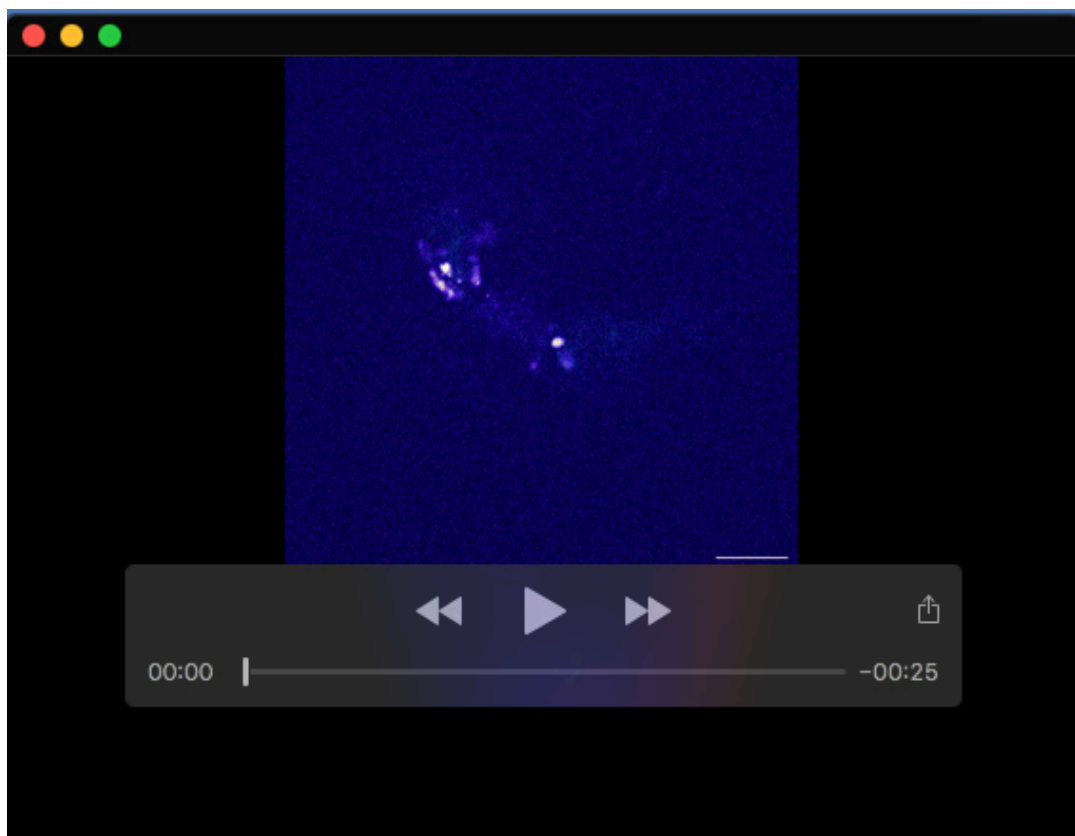

**Movie 2.** Multiphoton live-imaging movie of a BVSC gastruloid from 118h after aggregation, imaged at 30 minute intervals. Cyan, Blimp1-GFP; Yellow, Stella:eCFP. Scale bar = 100  $\mu$ m.

## Supplementary reference

1. van den Brink, S. C. *et al.* (2020) Single-cell and spatial transcriptomics reveal somitogenesis in gastruloids. *Nature* 582, 405-9 <https://doi.org/10.1038/s41586-020-2024-3>.
